# Supplementary material for: Identification of a Sex-Linked SNP Marker in the Salmon Louse (Lepeophtheirus salmonis) Using RAD Sequencing
Source: PLoS One. 2013 Oct 16;8(10):e77832. doi: 10.1371/journal.pone.0077832 (PMC3797693; doi:10.1371/journal.pone.0077832)
Supplement: Table S3 — Primers used for RT-qPCR analysis of prohibitin-2 expression in male and female adult L. salmonis. (XLSX) [file pone.0077832.s003.xlsx]

## Sheet: Sheet1
Accession No.	Annotation	Primer sequence (5' - 3')	Ta	Fragment size (bp)
BT121810.1	Prohibitin-2	GCGTATTCCCGACCAAAACT	55	167
		GAAGTTCTCAAGGGCGTTGT
Reference genes
ACO14905.1	Hypoxanthine-guanine phosphoribosyltransferase (HGPRT)	GCAGCAAACATCGAATCTCA	55	187
		TCTTTGCACGAACAAACTGC
ACO15319.1	RMD5 homolog A	TCTCCTTATGCCCACTTGCT	55	220
		GAGTTCCGTCCTTTGCATTC
